# Supplementary material for: The Cholesterol-Modulating Effect of Methanol Extract of Pigeon Pea (Cajanus cajan (L.) Millsp.) Leaves on Regulating LDLR and PCSK9 Expression in HepG2 Cells
Source: PubMed Central journal article supplement (PMC6385019; doi:10.3390/molecules24030493), 2019-01-30
Supplement: molecules-24-00493-s001.pdf [file molecules-24-00493-s001.pdf]

# Supplemental Figures

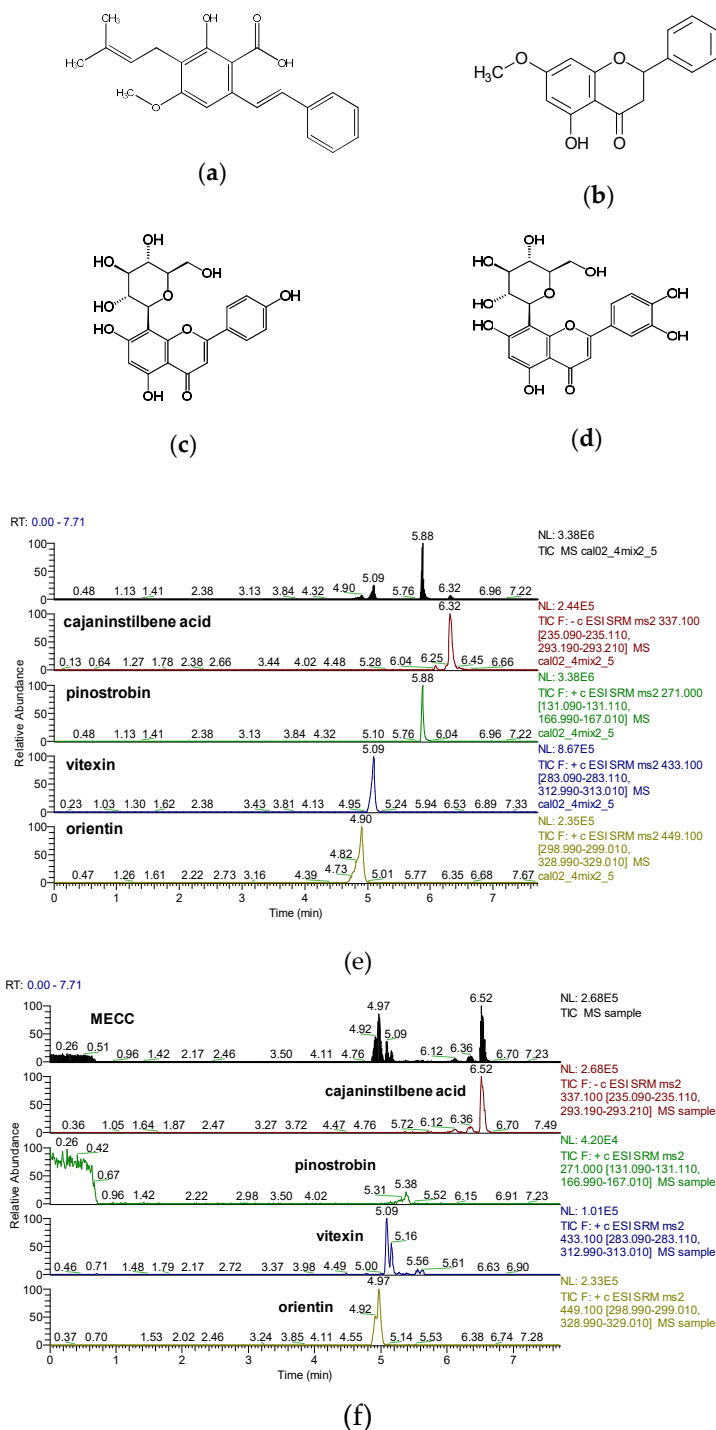

**Figure S1.** Chemical structure of (a) cajaninstilbene acid (b) pinostrobin (c) vitexin (d) orientin. (e) The multiple reaction monitoring (MRM) chromatograms of standard solution with 2.5 μM of cajaninstilbene acid, pinostrobin, vitexin and orientin. (f) The MRM chromatograms of 10 μL MECC sample (50 mg/mL).
